# Supplementary figures and images for: Adsorption of phosphate on surface of magnetic reed: characteristics, kinetic, isotherm, desorption, competitive and mechanistic studies
Source: Royal Society of Chemistry journal article supplement (doi:10.1039/c5ra25280f), 2016-01-01

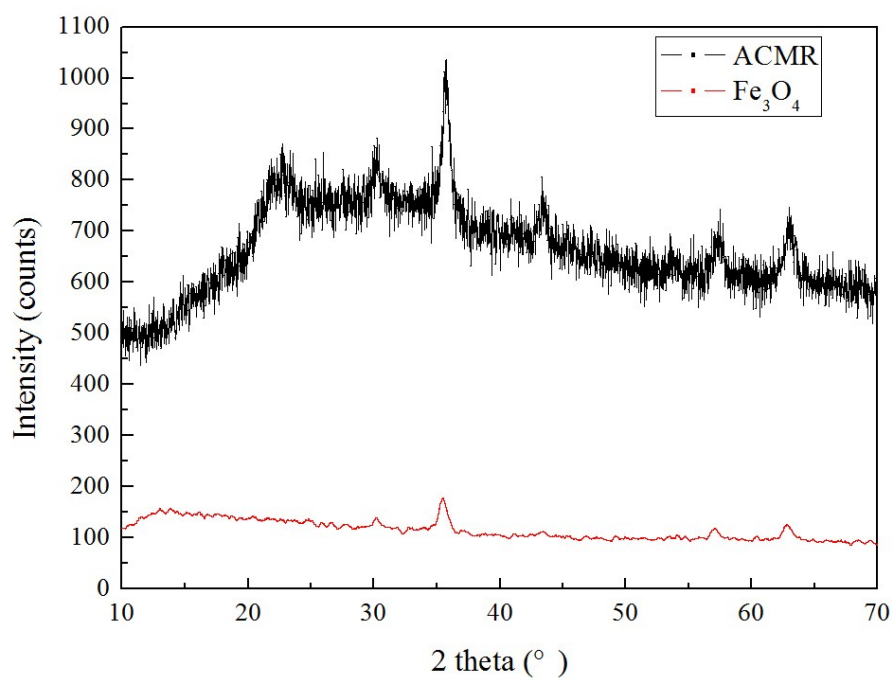

Fig.S1A .The powder X-ray diffraction patterns of ACMR and Fe<sub>3</sub>O<sub>4</sub>.

Supplement: c5ra25280f1.pdf [file c5ra25280f1.pdf]
